# Supplementary material
Source: Research Square preprint supplement (doi:10.21203/rs.3.rs-8813380/v1)
Supplement: Supplementary file 1 [file 7934a96eb97ab4ac898f3daf.docx]

Supplementary Figure 1. Flowchart of participant inclusion

2024.3-2025.2 Participants

n=131

Participants with complete data

n=106

Included in final analysis

n=78

Excluded：n=28

Twin pregnancy (3 cases)

Pre-pregnancy depression or taking antidepressants

(13 cases)

Living separately from partner (3 cases)

Living locally for less than 12 months (3 cases)

Active/passive smoking 6 months before pregnancy (6 cases)

Excluded：n=25

Missing clinical data

Supplementary Table 1. General characteristics of study participants

| Variables | Total (n = 78) | Poor (n = 6) | Fair (n = 34) | Good (n = 16) | Excellent (n = 22) | Statistic | P |
| --- | --- | --- | --- | --- | --- | --- | --- |
| Age, Mean ± SD | 30.23 ± 4.72 | 29.00 ± 3.85 | 29.85 ± 4.87 | 31.19 ± 4.65 | 30.45 ± 4.91 | F=0.43 | 0.729 |
| BMI, Mean ± SD | 23.11 ± 3.48 | 23.50 ± 1.86 | 22.92 ± 3.74 | 23.22 ± 3.21 | 23.22 ± 3.74 | F=0.07 | 0.975 |
| Educational level, n(%) |  |  |  |  |  | - | 0.276 |
| Junior high school or below | 17 (21.79) | 1 (16.67) | 12 (35.29) | 1 (6.25) | 3 (13.64) |  |  |
| High school/technical secondary school | 19 (24.36) | 1 (16.67) | 8 (23.53) | 5 (31.25) | 5 (22.73) |  |  |
| College/bachelor’s degree or above | 42 (53.85) | 4 (66.67) | 14 (41.18) | 10 (62.50) | 14 (63.64) |  |  |
| Occupation, n(%) |  |  |  |  |  | - | 0.898 |
| Freelancer | 33 (42.31) | 2 (33.33) | 15 (44.12) | 7 (43.75) | 9 (40.91) |  |  |
| Worker | 4 (5.13) | 0 (0.00) | 2 (5.88) | 1 (6.25) | 1 (4.55) |  |  |
| Staff | 32 (41.03) | 2 (33.33) | 15 (44.12) | 6 (37.50) | 9 (40.91) |  |  |
| Others | 9 (11.54) | 2 (33.33) | 2 (5.88) | 2 (12.50) | 3 (13.64) |  |  |
| Marital status, n(%) |  |  |  |  |  | - | 0.573 |
| Unmarried | 11 (14.10) | 0 (0.00) | 7 (20.59) | 1 (6.25) | 3 (13.64) |  |  |
| Married | 67 (85.90) | 6 (100.00) | 27 (79.41) | 15 (93.75) | 19 (86.36) |  |  |
| Past delivery history, n(%) |  |  |  |  |  | - | 0.345 |
| No | 51 (65.38) | 6 (100.00) | 21 (61.76) | 10 (62.50) | 14 (63.64) |  |  |
| Yes | 27 (34.62) | 0 (0.00) | 13 (38.24) | 6 (37.50) | 8 (36.36) |  |  |
| Stillbirth history, n(%) |  |  |  |  |  | - | 0.109 |
| No | 74 (94.87) | 5 (83.33) | 33 (97.06) | 14 (87.50) | 22 (100.00) |  |  |
| Yes | 4 (5.13) | 1 (16.67) | 1 (2.94) | 2 (12.50) | 0 (0.00) |  |  |
| Planned pregnancy, n(%) |  |  |  |  |  | - | 0.550 |
| Yes | 41 (52.56) | 3 (50.00) | 21 (61.76) | 7 (43.75) | 10 (45.45) |  |  |
| No | 37 (47.44) | 3 (50.00) | 13 (38.24) | 9 (56.25) | 12 (54.55) |  |  |
| Having children, n(%) |  |  |  |  |  | - | 0.345 |
| Yes | 27 (34.62) | 0 (0.00) | 13 (38.24) | 6 (37.50) | 8 (36.36) |  |  |
| No | 51 (65.38) | 6 (100.00) | 21 (61.76) | 10 (62.50) | 14 (63.64) |  |  |
| Domestic violence history, n(%) |  |  |  |  |  | - | 0.564 |
| Yes | 1 (1.28) | 0 (0.00) | 0 (0.00) | 0 (0.00) | 1 (4.55) |  |  |
| No | 77 (98.72) | 6 (100.00) | 34 (100.00) | 16 (100.00) | 21 (95.45) |  |  |
